# Supplementary material
Source: PubMed Central journal article supplement (PMC4434727)
Supplement: pnas.201423205SI.pdf [file pnas.201423205SI.pdf]

# Supporting Information

Varea et al. 10.1073/pnas.1423205112

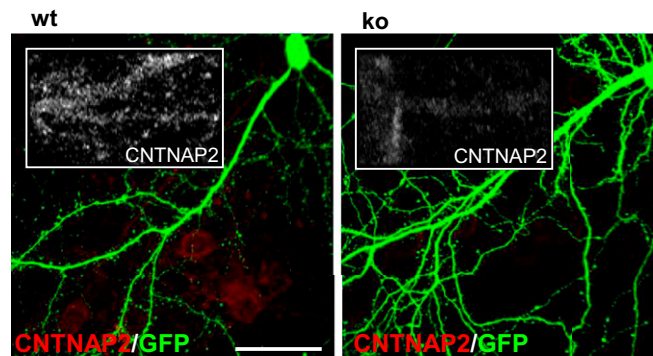

**Fig. S1.** Cultured cortical pyramidal neurons from wild-type and *Cntnap2*<sup>-/-</sup> mice. Immunostaining of GFP-expressing cultured 21 DIV wild-type and *Cntnap2*<sup>-/-</sup> neurons ( $n = 11-14$  neurons). *Insets* show CNTNAP2 immunofluorescence.

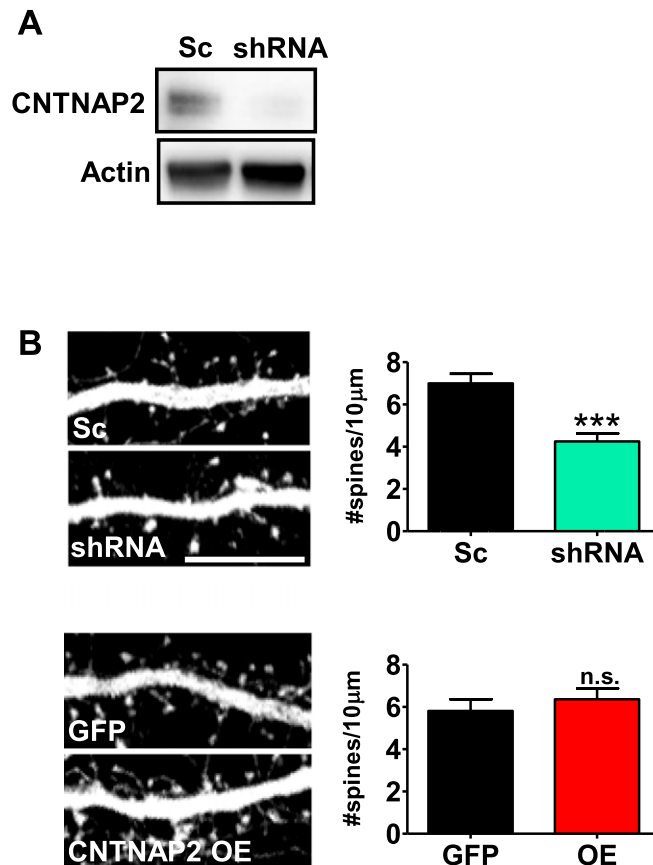

**Fig. S2.** Effect of CNTNAP2 knockdown and overexpression on spine density. (A) Effectiveness of RNAi to knockdown (KD) CNTNAP2 measured by Western blot. (B) Effects of RNAi-mediated KD and overexpression (OE) of CNTNAP2 in mature 21 DIV neurons. Data shown are means  $\pm$  SEM; \*\*\* $P < 0.001$  compared with scrambled control (Sc) by Student's unpaired  $t$  test.
